# Supplementary material for: Artificial Intelligence in Renal Cell Carcinoma Histopathology: Current Applications and Future Perspectives
Source: MDPI journal article supplement (doi:10.3390/diagnostics13132294), 2023-07-06
Supplement: s1 [file s1]

## Supplementary material

### 1. Search strategy

#### *Search strategy for the MEDLINE database*

##### **Search:**

(((((("Kidney Neoplasm"[Mesh] OR "Renal Cell Carcinoma"[tiab] OR "Renal Cancer"[tiab]) AND ("Artificial Intelligence"[Mesh] OR "deep learning"[tiab] OR "machine learning"[tiab]) AND ("Pathomics"[tiab] OR "Patholog"[tiab] OR "Histolog"[tiab] OR "Histopatholog"[tiab] OR "whole slide"[tiab]) ) NOT (Tomograph\*)) NOT (MRI)) NOT (CT-based)) NOT (Radiomic)

### 2. Analyzed models datasets

**Table S1. AI models datasets for diagnosis and subtyping**

| METHOD              | Test cohort dataset                                    | External validation dataset |
|---------------------|--------------------------------------------------------|-----------------------------|
| Fenstermaker et al. | TGCA*                                                  | N.A.                        |
| Zhu et al.          | Dartmouth-Hitchcock Medical Center, New Hampshire, USA | TGCA                        |
| Chen et al.         | TGCA                                                   | Shanghai General Hospital   |
| Tabibu et al.       | TGCA                                                   | N.A.                        |
| Abdeltawab et al.   | University of Louisville, Louisville, KY, USA          | NIH                         |

**Table S2. AI models datasets for grading**

| METHOD           | Test cohort dataset                     | External validation dataset |
|------------------|-----------------------------------------|-----------------------------|
| Yeh et al.       | University of Pittsburgh Medical Center | N.A.                        |
| Holdbrook et al. | Singapore General Hospital              | N.A.                        |
| Tian et al.      | TGCA                                    | N.A.                        |

**Table S3. AI methods datasets for prognostic models**

| METHOD        | Test cohort dataset | External validation dataset                 |
|---------------|---------------------|---------------------------------------------|
| Ning et al.   | TGCA                | N.A.                                        |
| Cheng et al.  | TCGA                | N.A.                                        |
| Schulz et al. | TGCA                | University Medical Center of Mainz, Germany |

**Table S4. AI models datasets for molecular morphologic connection and therapy response predictions**

| METHOD           | Test cohort dataset                                    | External validation dataset                                                                                                         |
|------------------|--------------------------------------------------------|-------------------------------------------------------------------------------------------------------------------------------------|
| Marostica et al. | TGCA                                                   | 1) NCI Clinical Proteomic Tumor Analysis Consortium (CPTAC)<br>2) Brigham and Women's Hospital Department of Pathology (Boston, MA) |
| Zhu et al.       | Dartmouth-Hitchcock Medical Center, New Hampshire, USA | TGCA                                                                                                                                |
| Go et al.        | Asan Medical Center, Seoul, South Korea                | N.A.                                                                                                                                |
| Zheng et al.     | GDC data portal, National Cancer Institute             | N.A.                                                                                                                                |
